# Supplementary material for: Fast plasma sheet flows and X line motion in the Earth's magnetotail: results from a global hybrid-Vlasov simulation
Source: Copernicus journal article supplement (doi:10.5194/angeo-36-1183-2018), 2018-09-10
Supplement: Supplementary file 1 [file angeo-36-1183-2018-supplement.zip]

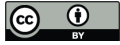

*Supplement of*

**Fast plasma sheet flows and X line motion in the Earth's magnetotail:  
results from a global hybrid-Vlasov simulation**

**Liisa Juusola et al.**

*Correspondence to:* Liisa Juusola (liisa.juusola@fmi.fi)

- [angeo-36-1183-2018-supplement-title-page.pdf](#)
- [S1.mp4](#)

The copyright of individual parts of the supplement might differ from the CC BY 4.0 License.
